# Supplementary material for: Phenotypic concordance in familial inflammatory bowel disease (IBD). Results of a nationwide IBD Spanish database
Source: Oxford University Press journal article supplement (doi:10.1016/j.crohns.2013.12.005), 2014-01-03
Supplement: mmc1.doc [file mmc1.doc]

**Supplemental Table 1. Subgroup analyses of phenotypic concordance in pairs concordant for Ulcerative Colitis [** (95%CI)]

| *Kind of pair (n)* | *Extension (E) of the disease* | *EIM* | Use of IMS | Use of biological agents | Need for colectomy |
| --- | --- | --- | --- | --- | --- |
| Parent/child  (n=19) | **0.17**  (0.00 to 0.56) | **<0** | **<0** | **<0** | **<0** |
| Siblings  (n=13) | **<0** | **0**  (0.00 to 0.00) | **0.52**  (0.10 to 0.94) | **<0** | **0**  (0.00 to 0.00) |
| Uncle-aunt/nephew-niece  (n=3) | Not calculated | Not calculated | Not calculated | Not calculated | Not calculated |
| First cousins  (n=4) | Not calculated | Not calculated | Not calculated | Not calculated | Not calculated |
| Grandparent/grandchild  (n=2) | Not calculated | Not calculated | Not calculated | Not calculated | Not calculated |
| 1st degree relatives*  (n=32) | **0.09**  (0.00 to 0.38) | **<0** | **0.03**  (0.00 to 0.38) | **<0** | **<0** |
| 2nd degree relatives  (n=9) | Not calculated | Not calculated | Not calculated | Not calculated | Not calculated |
| Same generation#  (n=17) | **<0** | **<0** | **0.45**  (0.11 to 0.79) | **<0** | **<0** |
| Different generation^ (n=24) | **0.06**  (0.00 to 0.37) | **<0** | **<0** | **<0** | **<0** |

*Parent/child, or siblings; Uncle-aunt/nephew-niece, grandparent/grandchild, or first cousins; #Siblings or first cousins; ^Parent/child, uncle-aunt/nephew-niece, or grandparent/grandchild; EIM=Extraintestinal manifestations; IMS=Immunosuppressors.

**Supplemental Table 2. Subgroup analyses of phenotypic concordance in pairs concordant for Crohn’s Disease [** (95%CI)]

| *Kind of pair (n)* | *Localization (L)* | *Stricturing behavior (B2)* | Fistlulizing behavior (B3) | Perianal disease | EIM | Use of IMS | *Use of Biologicals* | *Need for bowel resection* |
| --- | --- | --- | --- | --- | --- | --- | --- | --- |
| Parent/child  (n=18) | **<0** | **0.45**  (0.01 to 0.89) | **0.26**  (0.00 to 0.75) | **0.10**  (0.00 to 0.50) | **<0** | **<0** | **<0** | **0.14**  (0.00 to 0.55) |
| Siblings  (n=29) | **0.38**  (0.04 to 0.72) | **0.32**  (0.00 to 0.70) | **0.31**  (0.00 to 0.70) | **<0** | **0.11**  (0.00 to 0.50) | **<0** | **<0** | **0.40**  (0.09 to 070) |
| Uncle-aunt/nephew-niece  (n=9) | Not calculated | Not calculated | Not calculated | Not calculated | Not calculated | Not calculated | Not calculated | Not calculated |
| First cousins  (n=13) | **<0** | **0.13**  (0.00 to 0.39) | **0.31**  (0.00 to 0.81) | **<0** | **<0** | **0.26**  (0.00 to 0.88) | **0.09**  (0.00 to 0.61) | **0.03**  (0.00 to 0.57) |
| Grandparent/grandchild  (n=0) | Not calculated | Not calculated | Not calculated | Not calculated | Not calculated | Not calculated | Not calculated | Not calculated |
| 1st degree relatives*  (n=47) | **0.03**  (0.00 to 0.24) | **0.37**  (0.08 to 0.67) | **0.29**  (0.00 to 0.60) | **<0** | **0.07**  (0.00 to 0.38) | **<0** | **<0** | **0.30**  (0.05 to 0.55) |
| 2nd degree relatives  (n=22) | **<0** | **0.10**  (0.00 to 0.31) | **0.18**  (0.00 to 0.63) | **0.17**  (0.00 to 0.58) | **<0** | **0.22**  (0.00 to 0.68) | **0.22**  (0.00 to 0.63) | **<0** |
| Same generation#  (n=42) | **0.06**  (0.00 to 0.29) | **0.22**  (0.00 to 0.50) | **0.30**  (0.00 to 0.63) | **<0** | **0.01**  (0.00 to 0.32) | **<0** | **<0** | **0.32**  (0.04 to 0.61) |
| Different generation^ (n=27) | **<0** | **0.32**  (0.00 to 0.68) | **0.20**  (0.00 to 0.62) | **0.25**  (0.00 to 0.62) | **<0** | **<0** | **0.09**  (0.00 to 0.48) | **0.09**  (0.00 to 0.42) |

*Parent/child, or siblings; Uncle-aunt/nephew-niece, grandparent/grandchild, or first cousins; #Siblings or first cousins; ^Parent/child, uncle-aunt/nephew-niece, or grandparent/grandchild; EIM=Extraintestinal manifestations; IMS=Immunosuppressors.
